# Supplementary material
Source: Springer Nature journal article supplement (https://www.springermedizin.de/resource/supplementary/40478_2014_122_MOESM1_ESM.pdf/25658200)

**A**Lymphoblast  
cell lines: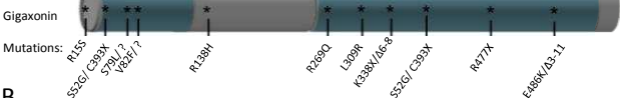**B**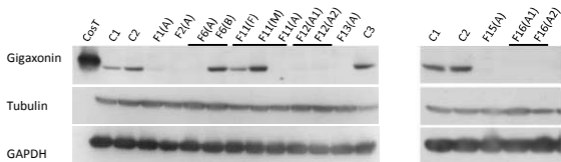**C**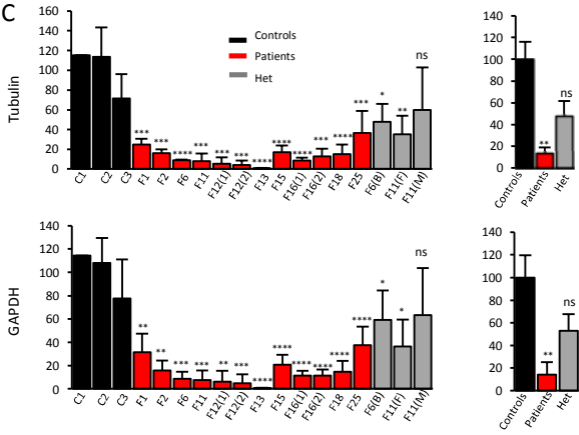

Supplement: MOESM1 [file 25658200]
